# Supplementary material for: Technical note: Applicability of physics-based and machine-learning-based algorithms of geostationary satellite in retrieving the diurnal cycle of cloud base height
Source: Copernicus journal article supplement (doi:10.5194/egusphere-2024-1516), 2024-06-17
Supplement: Supplementary file 1 [file egusphere-2024-1516-supplement.pdf]

## *Supplementary Materials for*

### **Technical note: Applicability of physics-based and machine-learning-based algorithms of geostationary satellite in retrieving the diurnal cycle of cloud base height**

Mengyuan Wang<sup>1</sup>, Min Min<sup>1\*</sup>, Jun Li<sup>2</sup>, Han Lin<sup>3</sup>, Yongen Liang<sup>1</sup>,  
Binlong Chen<sup>2</sup>, Zhigang Yao<sup>4</sup>, Na Xu<sup>2</sup>, Miao Zhang<sup>2</sup>

*1 School of Atmospheric Sciences, Southern Marine Science and Engineering Guangdong Laboratory (Zhuhai), and Guangdong Province Key Laboratory for Climate Change and Natural Disaster Studies, Zhuhai 519082, China*

*2 Key Laboratory of Radiometric Calibration and Validation for Environmental Satellites and Innovation Center for FengYun Meteorological Satellite (FYSIC), National Satellite Meteorological Center (National Center for Space Weather), China Meteorological Administration, Beijing 100081, China*

*3 Key Laboratory of Spatial Data Mining and Information Sharing of Ministry of Education, National and Local Joint Engineering Research Center of Satellite Geospatial Information Technology, Fuzhou University, Fuzhou 350108, China*

*4 Beijing Institute of Applied Meteorology, Beijing 100029, China*

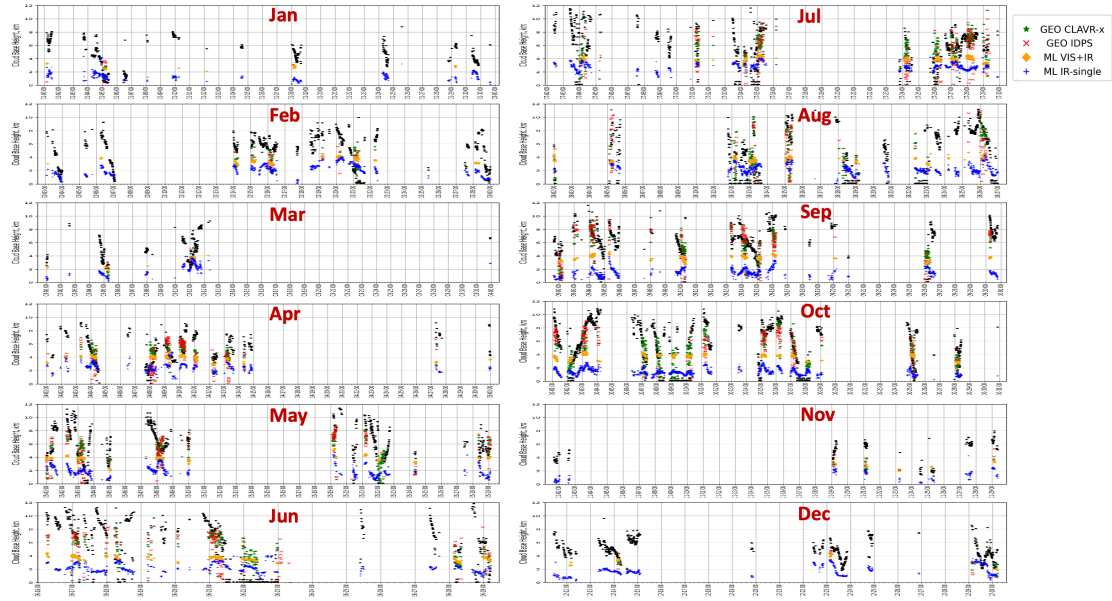

**Fig. S1.** Same as Figure 6, monthly comparisons of CBHs from four GEO satellite algorithms with the CBH sample results from Cloud radar at Beijing Nanjiao station (black solid circle).

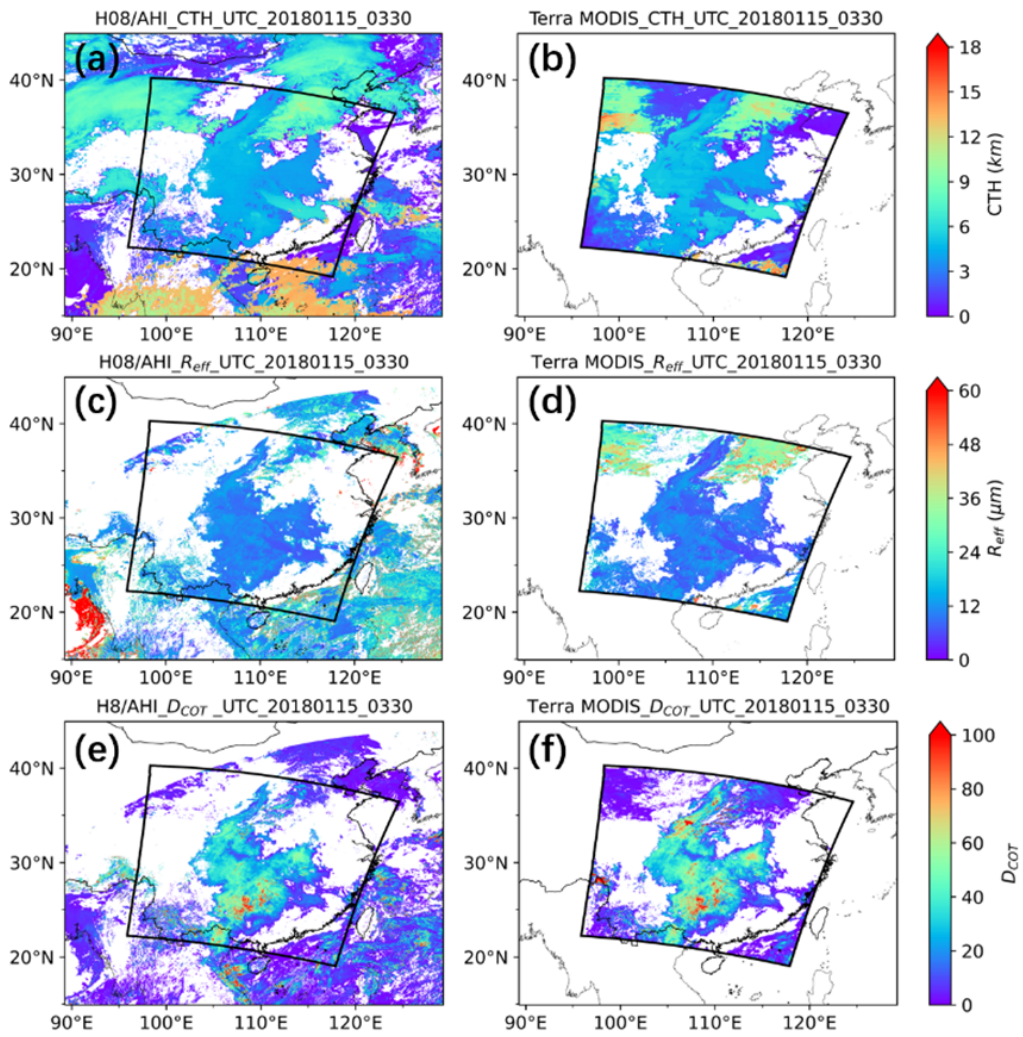

**Fig. S2.** Comparison of CTH (top row panel),  $D_{COT}$  (middle row panel), and  $R_{eff}$  (bottom row panel) from Himawari-8 and operational Terra/MODIS(MYD06) at 03:30 UTC on January 15, 2018.

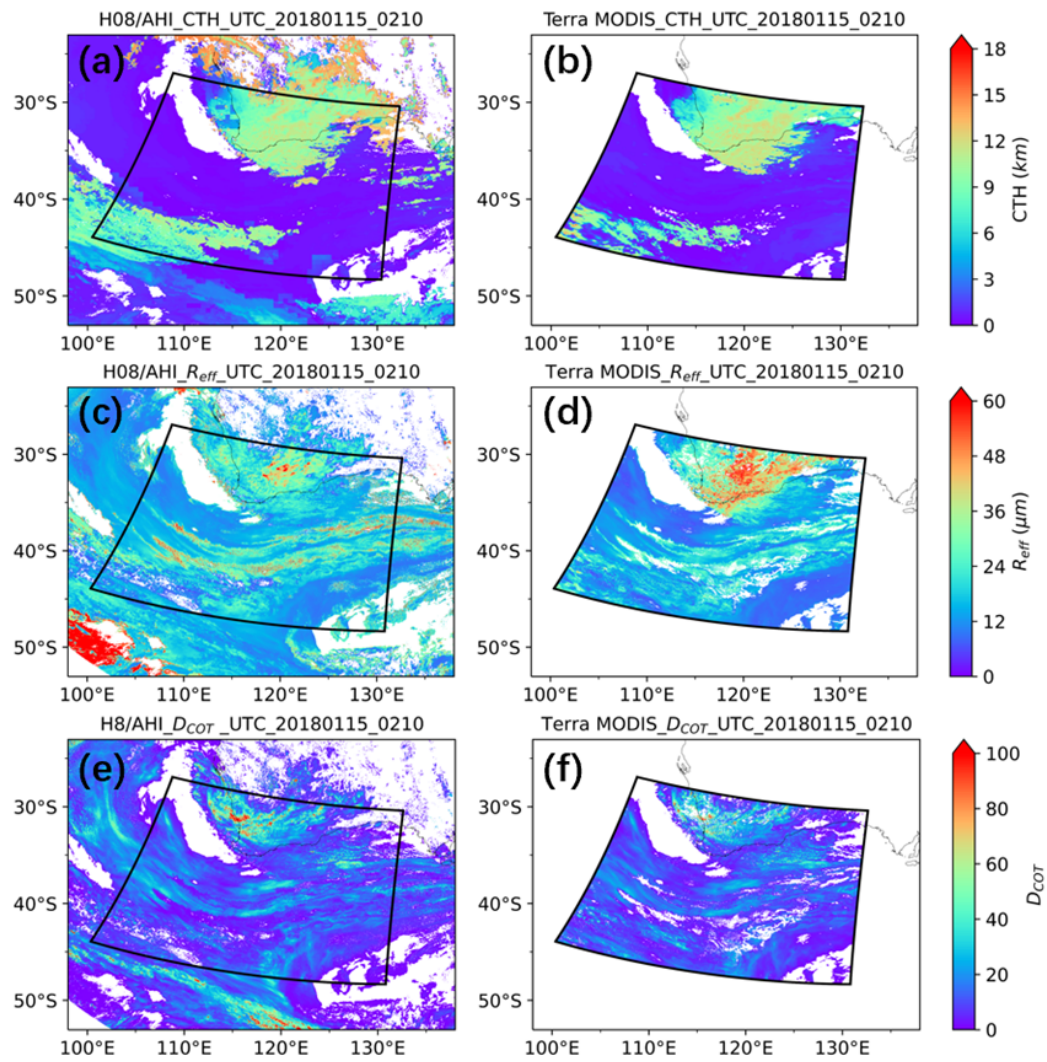

**Fig. S3.** The same as Fig. A1, but for the case at 02:10 UTC on January 15, 2018.

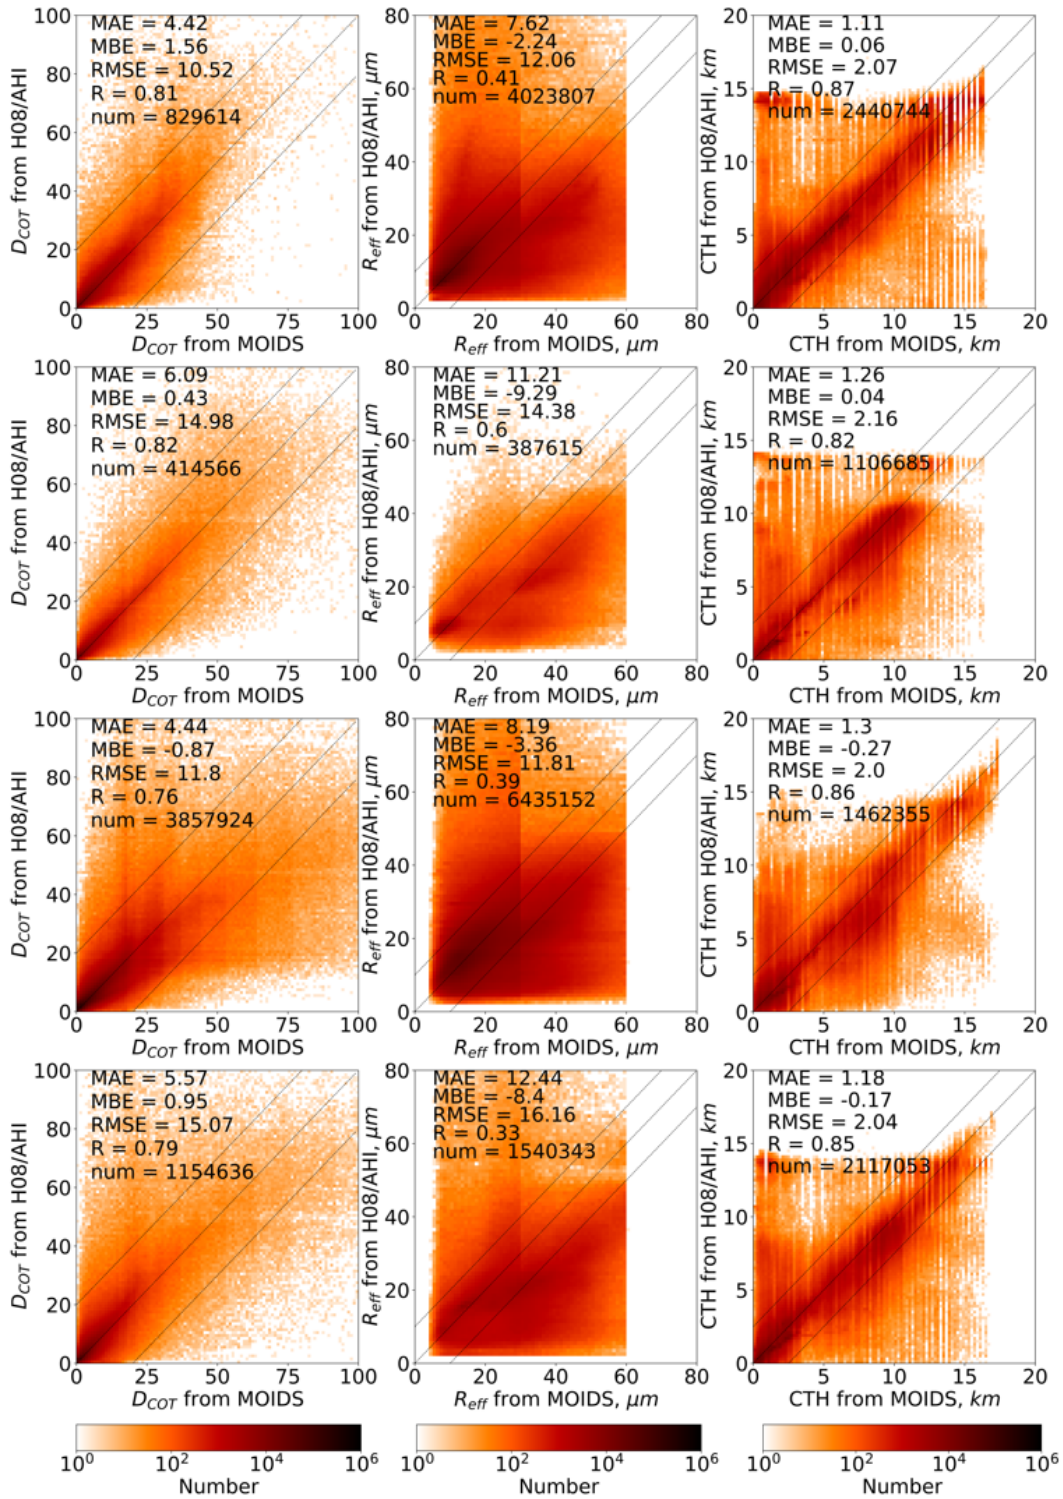

**Fig. S4.** Comparisons of  $D_{COT}$  (left column panel),  $R_{eff}$  (middle column panel), CTH (right column panel) between H8/AHI and MODIS in January (first row panel), April (second row panel), July (third row panel) and October (fourth row panel) of 2018.

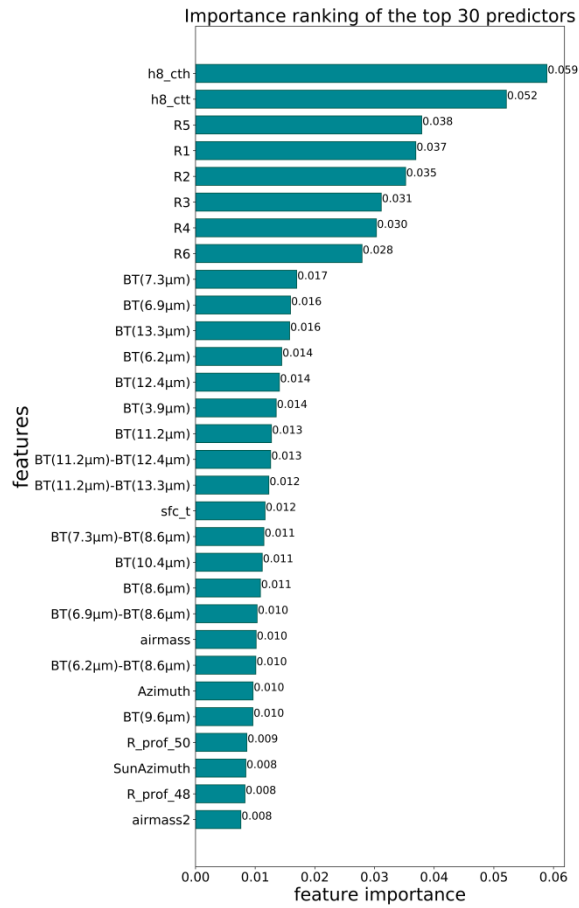

**Fig. S5.** Importance ranking of the top 30 predictors in the VIS+IR RF model. (airmass =  $\text{AirMass}(1/\cos(\text{VZA}))$ ), airmass2= $\text{AirMass}(1/\cos(\text{SZA}))$ ),  $R_i = \text{airmass2} \times \text{BTD}_i \times 0.01$ ). sfc\_t means the temperature at the surface and R\_prof means the relative humidity at the surface.

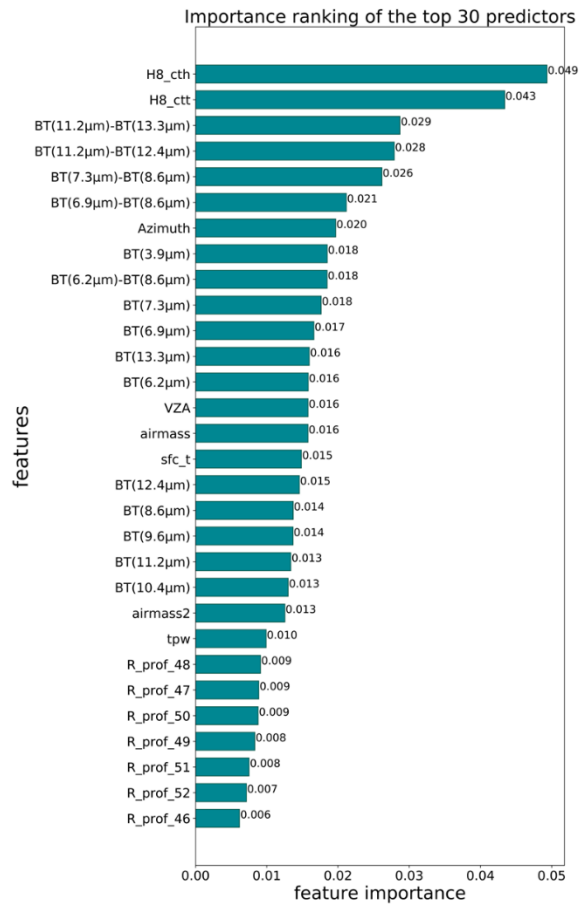

**Fig. S6.** The same as Fig. S5, but for the IR-single RF model.

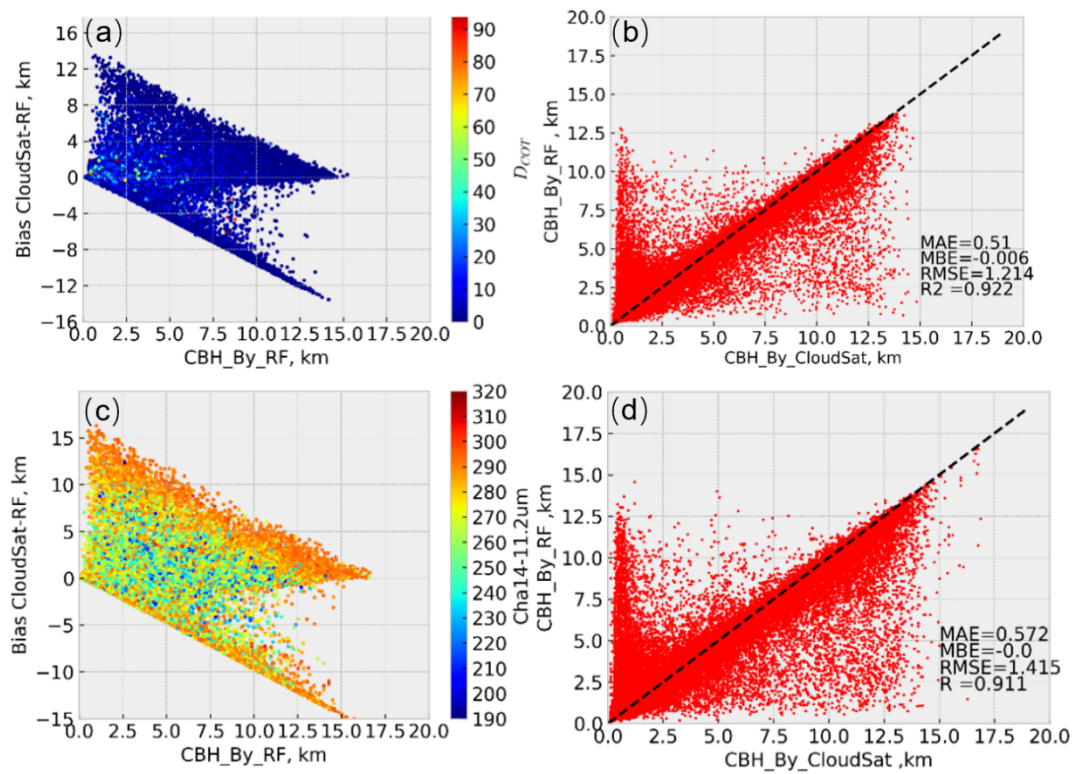

**Fig. S7.** Scatterplots of the CBHs retrieved by the IR-single model algorithm (a) before and (b) after optimization compared with the CBHs from the joint CALIPSO/CloudSat product. The subfigures (c) and (d) are the same as subfigures (a) and (b), but for the IR brightness temperature values.



**Table S1.** Range of filtered  $D_{\text{COT}}$  values and the calculated correlation statistics MAE, MBE, RMSE,  $R$  and the number of matched points filtered out.

| $\langle D_{\text{COT}} \rangle$ | MAE   | MBE    | RMSE  | R     | drop number |
|----------------------------------|-------|--------|-------|-------|-------------|
| <b>0.3</b>                       | 0.705 | -0.018 | 1.651 | 0.895 | 6           |
| <b>0.4</b>                       | 0.705 | -0.018 | 1.651 | 0.895 | 68          |
| <b>0.5</b>                       | 0.703 | -0.017 | 1.648 | 0.895 | 344         |
| <b>0.6</b>                       | 0.695 | -0.017 | 1.631 | 0.895 | 969         |
| <b>0.7</b>                       | 0.68  | -0.018 | 1.599 | 0.896 | 2149        |
| <b>0.8</b>                       | 0.653 | -0.016 | 1.542 | 0.899 | 3895        |
| <b>0.9</b>                       | 0.626 | -0.012 | 1.485 | 0.903 | 5430        |
| <b>1.0</b>                       | 0.603 | -0.01  | 1.431 | 0.907 | 6810        |
| <b>1.1</b>                       | 0.585 | -0.011 | 1.39  | 0.91  | 8140        |
| <b>1.2</b>                       | 0.568 | -0.009 | 1.352 | 0.913 | 9291        |
| <b>1.3</b>                       | 0.551 | -0.008 | 1.312 | 0.916 | 10476       |
| <b>1.4</b>                       | 0.535 | -0.009 | 1.273 | 0.919 | 11586       |
| <b>1.5</b>                       | 0.523 | -0.008 | 1.245 | 0.92  | 12607       |
| <b>1.6</b>                       | 0.51  | -0.006 | 1.214 | 0.922 | 13751       |
| <b>1.7</b>                       | 0.499 | -0.008 | 1.186 | 0.923 | 14833       |
| <b>1.8</b>                       | 0.49  | -0.009 | 1.162 | 0.925 | 15699       |
| <b>1.9</b>                       | 0.48  | -0.01  | 1.14  | 0.926 | 16574       |
| <b>2.0</b>                       | 0.469 | -0.009 | 1.112 | 0.928 | 17469       |
| <b>2.1</b>                       | 0.459 | -0.01  | 1.083 | 0.93  | 18361       |
| <b>2.2</b>                       | 0.451 | -0.011 | 1.066 | 0.931 | 19218       |
| <b>2.3</b>                       | 0.443 | -0.012 | 1.046 | 0.932 | 20080       |
| <b>2.4</b>                       | 0.436 | -0.011 | 1.029 | 0.933 | 20878       |
| <b>2.5</b>                       | 0.431 | -0.011 | 1.015 | 0.933 | 21630       |
| <b>2.6</b>                       | 0.425 | -0.012 | 0.999 | 0.934 | 22453       |
| <b>2.7</b>                       | 0.418 | -0.012 | 0.982 | 0.935 | 23282       |
| <b>2.8</b>                       | 0.414 | -0.012 | 0.971 | 0.936 | 23980       |
| <b>2.9</b>                       | 0.409 | -0.011 | 0.96  | 0.936 | 24685       |
| <b>3.0</b>                       | 0.405 | -0.012 | 0.95  | 0.936 | 25360       |
| <b>3.1</b>                       | 0.402 | -0.012 | 0.944 | 0.936 | 26042       |
| <b>3.2</b>                       | 0.398 | -0.013 | 0.934 | 0.936 | 26778       |
| <b>3.3</b>                       | 0.393 | -0.014 | 0.923 | 0.936 | 27492       |
| <b>3.4</b>                       | 0.389 | -0.014 | 0.913 | 0.937 | 28127       |
| <b>3.5</b>                       | 0.384 | -0.016 | 0.9   | 0.937 | 28793       |
| <b>3.6</b>                       | 0.379 | -0.016 | 0.889 | 0.938 | 29465       |
| <b>3.7</b>                       | 0.376 | -0.016 | 0.882 | 0.938 | 30128       |
| <b>3.8</b>                       | 0.372 | -0.017 | 0.87  | 0.938 | 30772       |
| <b>3.9</b>                       | 0.368 | -0.017 | 0.862 | 0.939 | 31388       |

**Table S2.** Range of filtered IR channel 14 values and the calculated correlation statistics MAE, MBE, RMSE,  $R$  and the number of matched points filtered out.

| <b>Cha14</b> | <b>MAE</b> | <b>MBE</b> | <b>RMSE</b> | <b>R</b> | <b>drop numbers</b> |
|--------------|------------|------------|-------------|----------|---------------------|
| <b>270</b>   | 0.538      | -0.005     | 1.293       | 0.924    | 35490               |
| <b>271</b>   | 0.541      | -0.006     | 1.301       | 0.923    | 33922               |
| <b>272</b>   | 0.541      | -0.006     | 1.307       | 0.922    | 32187               |
| <b>273</b>   | 0.544      | -0.006     | 1.315       | 0.921    | 30483               |
| <b>274</b>   | 0.544      | -0.006     | 1.32        | 0.921    | 28723               |
| <b>275</b>   | 0.545      | -0.004     | 1.327       | 0.92     | 26949               |
| <b>276</b>   | 0.547      | -0.004     | 1.336       | 0.919    | 25169               |
| <b>277</b>   | 0.55       | -0.003     | 1.35        | 0.917    | 23408               |
| <b>278</b>   | 0.556      | -0.004     | 1.366       | 0.916    | 21769               |
| <b>279</b>   | 0.562      | -0.002     | 1.384       | 0.914    | 20307               |
| <b>280</b>   | 0.567      | -0.002     | 1.399       | 0.913    | 18676               |
| <b>281</b>   | 0.572      | 0          | 1.415       | 0.911    | 16917               |
| <b>282</b>   | 0.579      | 0          | 1.435       | 0.909    | 15228               |
| <b>283</b>   | 0.587      | 0.001      | 1.455       | 0.907    | 13748               |
| <b>284</b>   | 0.595      | 0.002      | 1.478       | 0.905    | 12233               |
| <b>285</b>   | 0.605      | 0.001      | 1.503       | 0.903    | 10720               |
| <b>286</b>   | 0.617      | 0.001      | 1.531       | 0.901    | 9305                |
| <b>287</b>   | 0.632      | 0          | 1.568       | 0.897    | 8083                |
| <b>288</b>   | 0.65       | 0.002      | 1.612       | 0.893    | 6839                |
| <b>289</b>   | 0.667      | 0.001      | 1.654       | 0.89     | 5708                |
| <b>290</b>   | 0.686      | 0          | 1.698       | 0.886    | 4606                |
| <b>291</b>   | 0.703      | 0.001      | 1.737       | 0.884    | 3552                |
| <b>292</b>   | 0.725      | -0.001     | 1.785       | 0.88     | 2675                |
| <b>293</b>   | 0.747      | -0.004     | 1.838       | 0.875    | 1874                |
| <b>294</b>   | 0.762      | -0.006     | 1.875       | 0.872    | 1202                |
| <b>295</b>   | 0.772      | -0.007     | 1.897       | 0.87     | 704                 |
| <b>296</b>   | 0.78       | -0.008     | 1.918       | 0.868    | 370                 |
| <b>297</b>   | 0.782      | -0.007     | 1.923       | 0.868    | 262                 |
| <b>298</b>   | 0.782      | -0.007     | 1.923       | 0.868    | 217                 |
| <b>299</b>   | 0.782      | -0.007     | 1.923       | 0.868    | 183                 |
